# Supplementary material
Source: PubMed Central journal article supplement (PMC4205631)
Supplement: pnas.201408556SI.pdf [file pnas.201408556SI.pdf]

# Supporting Information

Guo et al. 10.1073/pnas.1408556111

## SI Materials and Methods

Four percent formaldehyde solution, human signaling Pathway-Finder RT<sup>2</sup> Profiler PCR Array (SABiosciences, cat #PAHS-071Z), RT<sup>2</sup> First Strand kit (SABiosciences, cat #C-03), RT<sup>2</sup> SYBR Green/Fluorescein qPCR Mastermix (SABiosciences, cat #PA-011), and Qiagen RNeasy Mini Kit were purchased from Qiagen. Human breast cancer tissue (BR1503b, BR1505, and T088) and normal tissue (BN00011 and BN1002a) arrays were purchased from US Biomax. Dulbecco's PBS, DAPI, Quant-iT RNA Assay Kit, 0.25% trypsin/2.6 mM EDTA solution, Gibco DMEM, Gibco DMEM/F12(1:1) Roswell Park Memorial Institute (RPMI)-1640 medium, and McCoy's 5A medium were purchased from Invitrogen. MEGM Mammary Epithelial Cell Growth Medium was purchased from Lonza. Quantum Simply Cellular microbeads were purchased from Bangs Laboratory.

Mouse anti-human intercellular adhesion molecule-1 (ICAM-1) monoclonal antibody (aICAM1), IgG isotype control, and NorthernLights 557 (NL557)-conjugated donkey anti-mouse IgG were purchased from R&D Systems. Phycoerythrin (PE)-conjugated mouse anti-human ICAM-1 antibody (PE-aCXCR4) and PE-conjugated mouse IgG isotype (PE-IgG) were purchased from BioLegend. The 1-ethyl-3-(3-dimethylaminopropyl) carbodiimide hydrochloride, *N*-hydroxysuccinimide, BSA, anhydrous DMSO, FITC, and Nanosep 300K Omega centrifugal device were purchased from Sigma-Aldrich. The Lab-Tek II Chamber Slide System was obtained from Thermo Fisher Scientific. Fluorogel with Tris buffer was purchased from Electron Microscopy Sciences. Activation Buffer and Coupling Buffer were purchased from Ocean Nanotech.

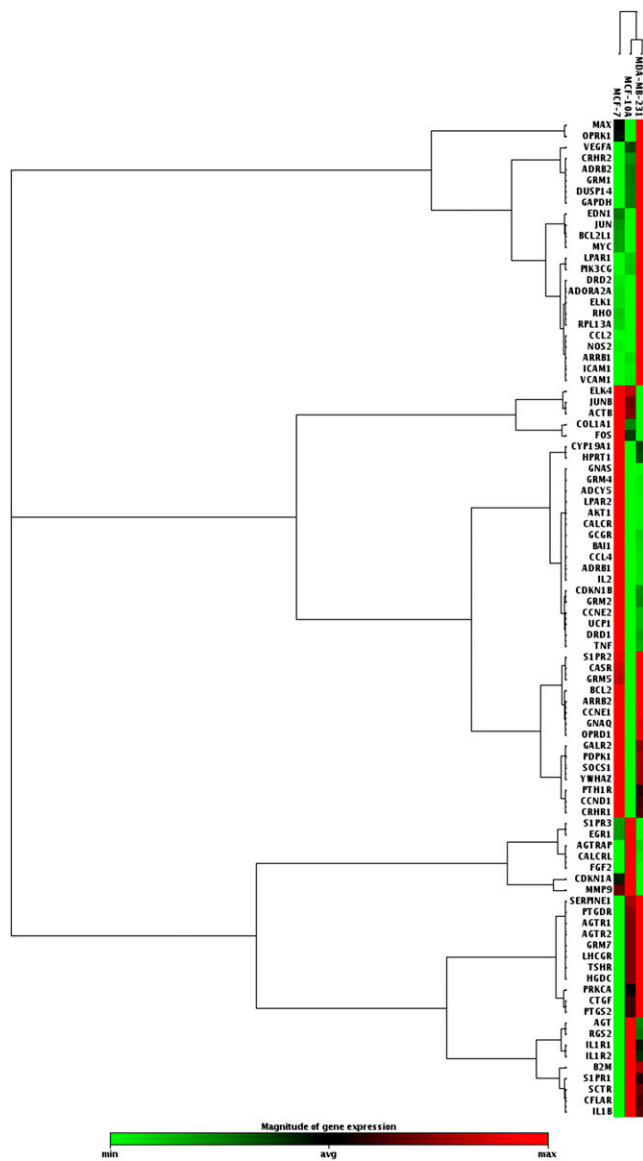

Fig. S1. Gene expression analysis for 84 G-protein coupled receptor signaling genes.

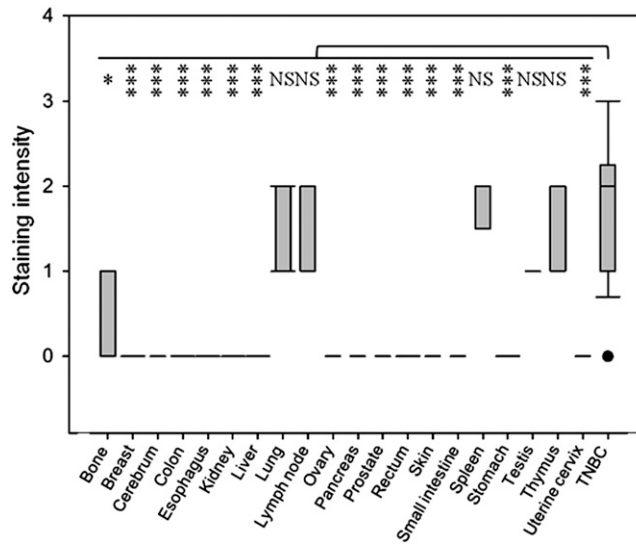

**Fig. S2.** Quantification of ICAM-1 staining intensities in various human normal organs: bone ( $n = 5$ ), breast ( $n = 14$ ), cerebrum ( $n = 5$ ), colon ( $n = 11$ ), esophagus ( $n = 10$ ), kidney ( $n = 11$ ), liver ( $n = 11$ ), lung ( $n = 11$ ), lymph node ( $n = 5$ ), ovary ( $n = 5$ ), pancreas ( $n = 5$ ), prostate ( $n = 4$ ), rectum ( $n = 10$ ), skin ( $n = 5$ ), small intestine ( $n = 5$ ), spleen ( $n = 5$ ), stomach ( $n = 11$ ), testis ( $n = 5$ ), thymus ( $n = 5$ ), uterine cervix ( $n = 5$ ), and triple negative breast cancer (TNBC) tissue ( $n = 26$ ). Data are presented as a box-and-whisker plot. \* $P < 0.05$ ; \*\*\* $P < 0.001$ ; NS, not significant compared with TNBC tissues.

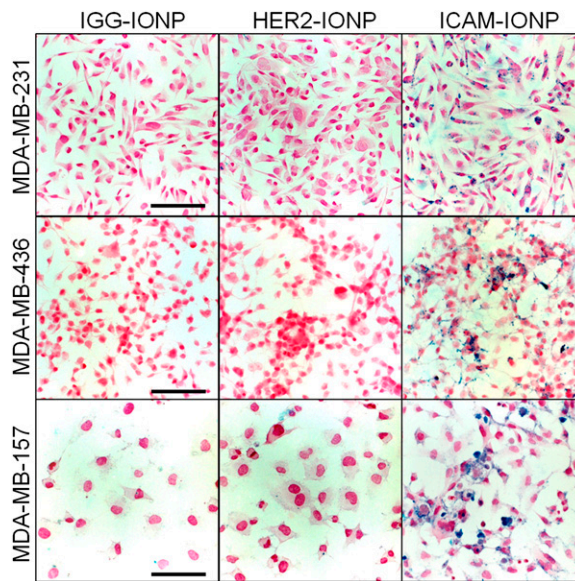

**Fig. S3.** Representative microscopic images of Prussian blue staining of ion oxide nanoparticles functionalized with IgG (IGG-IONP), human epidermal growth factor receptor 2 (HER2-IONP), and ICAM-1 (ICAM-IONP) demonstrating uptake by MDA-MB-231, MDA-MB-436, and MDA-MB-157. Scale bars represent 20  $\mu\text{m}$ .

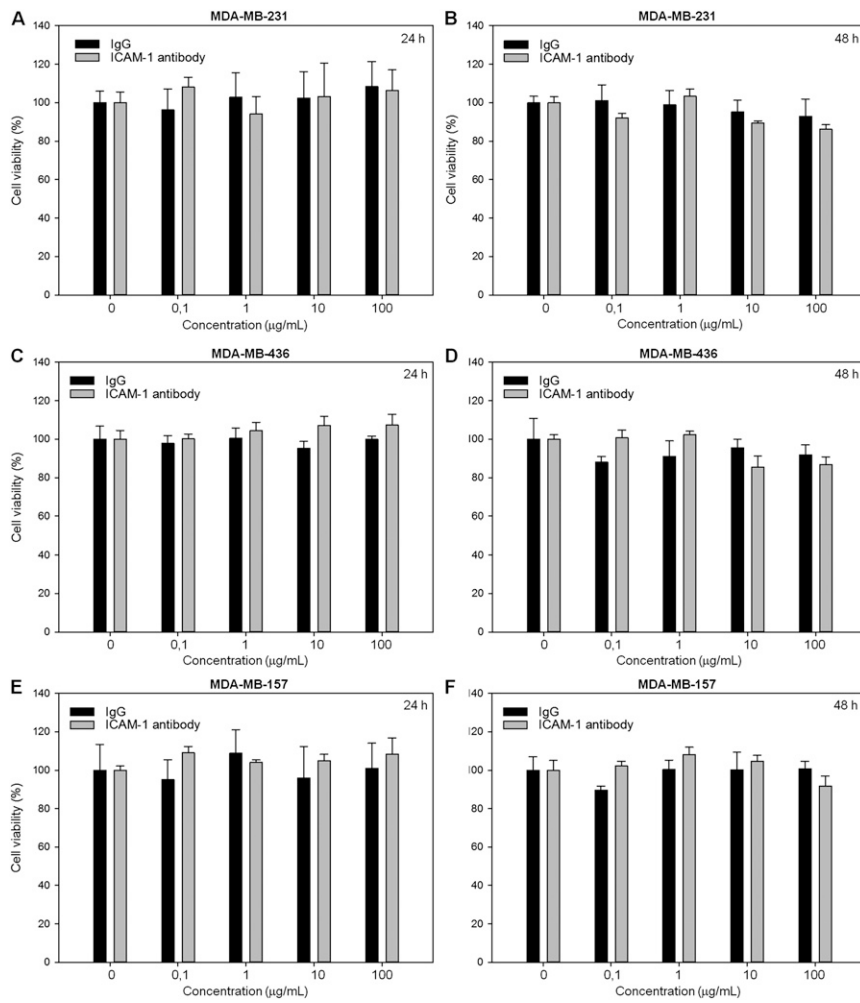

**Fig. S4.** Effect of the free ICAM-1 antibody on the proliferation of TNBC cells at different concentrations: MDA-MB-231 (A and B), MDA-MB-436 (C and D), MDA-MB-157 (E and F). Nonspecific IgG was used as control. The duration of cell proliferation was 24 h for A, C, and E and 48 h for B, D, and F.

**Table S1. List of gene symbols**

| Symbol  | Description                                                                              |
|---------|------------------------------------------------------------------------------------------|
| ADCY5   | Adenylate cyclase 5                                                                      |
| ADORA2A | Adenosine A2a receptor                                                                   |
| ADRB1   | Adrenergic $\beta_1$ -receptor                                                           |
| ADRB2   | Adrenergic $\beta_2$ -receptor, surface                                                  |
| AGT     | Angiotensinogen (serpin peptidase inhibitor, clade A, member 8)                          |
| AGTR1   | Angiotensin II receptor, type 1                                                          |
| AGTR2   | Angiotensin II receptor, type 2                                                          |
| AGTRAP  | Angiotensin II receptor-associated protein                                               |
| AKT1    | V-akt murine thymoma viral oncogene homolog 1                                            |
| ARRB1   | Arrestin, $\beta_1$                                                                      |
| ARRB2   | Arrestin, $\beta_2$                                                                      |
| BAI1    | Brain-specific angiogenesis inhibitor 1                                                  |
| BCL2    | B-cell CLL/lymphoma 2                                                                    |
| BCL2L1  | BCL2-like 1                                                                              |
| CALCR   | Calcitonin receptor                                                                      |
| CALCRL  | Calcitonin receptor-like                                                                 |
| CASR    | Calcium-sensing receptor                                                                 |
| CCL2    | Chemokine (C-C motif) ligand 2                                                           |
| CCL4    | Chemokine (C-C motif) ligand 4                                                           |
| CCND1   | Cyclin D1                                                                                |
| CCNE1   | Cyclin E1                                                                                |
| CCNE2   | Cyclin E2                                                                                |
| CDKN1A  | Cyclin-dependent kinase inhibitor 1A (p21, Cip1)                                         |
| CDKN1B  | Cyclin-dependent kinase inhibitor 1B (p27, Kip1)                                         |
| CFLAR   | CASP8 and FADD-like apoptosis regulator                                                  |
| COL1A1  | Collagen, type I, $\alpha_1$                                                             |
| CRHR1   | Corticotropin-releasing hormone receptor 1                                               |
| CRHR2   | Corticotropin-releasing hormone receptor 2                                               |
| CTGF    | Connective tissue growth factor                                                          |
| CYP19A1 | Cytochrome P450, family 19, subfamily A, polypeptide 1                                   |
| DRD1    | Dopamine receptor D1                                                                     |
| DRD2    | Dopamine receptor D2                                                                     |
| DUSP14  | Dual-specificity phosphatase 14                                                          |
| S1PR1   | Sphingosine-1-phosphate receptor 1                                                       |
| LPAR1   | Lysophosphatidic acid receptor 1                                                         |
| S1PR3   | Sphingosine-1-phosphate receptor 3                                                       |
| LPAR2   | Lysophosphatidic acid receptor 2                                                         |
| S1PR2   | Sphingosine-1-phosphate receptor 2                                                       |
| EDN1    | Endothelin 1                                                                             |
| EGR1    | Early growth response 1                                                                  |
| ELK1    | ELK1, member of ETS oncogene family                                                      |
| ELK4    | ELK4, ETS-domain protein (SRF accessory protein 1)                                       |
| FGF2    | Fibroblast growth factor 2 (basic)                                                       |
| FOS     | FBJ murine osteosarcoma viral oncogene homolog                                           |
| GALR2   | Galanin receptor 2                                                                       |
| GCGR    | Glucagon receptor                                                                        |
| GNAQ    | Guanine nucleotide binding protein (G protein), q polypeptide                            |
| GNAS    | GNAS complex locus                                                                       |
| GRM1    | Glutamate receptor, metabotropic 1                                                       |
| GRM2    | Glutamate receptor, metabotropic 2                                                       |
| GRM4    | Glutamate receptor, metabotropic 4                                                       |
| GRM5    | Glutamate receptor, metabotropic 5                                                       |
| GRM7    | Glutamate receptor, metabotropic 7                                                       |
| ICAM1   | Intercellular adhesion molecule 1                                                        |
| IL1B    | Interleukin 1 $\beta$                                                                    |
| IL1R1   | Interleukin 1 receptor, type I                                                           |
| IL1R2   | Interleukin 1 receptor, type II                                                          |
| IL2     | Interleukin 2                                                                            |
| JUN     | Jun proto-oncogene                                                                       |
| JUNB    | Jun B proto-oncogene                                                                     |
| LHCGR   | Luteinizing hormone/choriogonadotropin receptor                                          |
| MAX     | MYC-associated factor X                                                                  |
| MMP9    | Matrix metalloproteinase 9 (gelatinase B, 92-kDa gelatinase, 92-kDa type IV collagenase) |

**Table S1. Cont.**

| Symbol   | Description                                                                                   |
|----------|-----------------------------------------------------------------------------------------------|
| MYC      | V-myc myelocytomatosis viral oncogene homolog (avian)                                         |
| NOS2     | Nitric oxide synthase 2, inducible                                                            |
| OPRD1    | Opioid receptor, $\delta_1$                                                                   |
| OPRK1    | Opioid receptor, $\kappa_1$                                                                   |
| PDPK1    | 3-Phosphoinositide-dependent protein kinase-1                                                 |
| PIK3CG   | Phosphoinositide-3-kinase, catalytic, $\gamma$ -polypeptide                                   |
| PRKCA    | Protein kinase C, $\alpha$                                                                    |
| PTGDR    | Prostaglandin D2 receptor (DP)                                                                |
| PTGS2    | Prostaglandin-endoperoxide synthase 2 (prostaglandin G/H synthase and cyclooxygenase)         |
| PTH1R    | Parathyroid hormone 1 receptor                                                                |
| RGS2     | Regulator of G protein signaling 2, 24 kDa                                                    |
| RHO      | Rhodopsin                                                                                     |
| SCTR     | Secretin receptor                                                                             |
| SERPINE1 | Serpin peptidase inhibitor, clade E (nexin, plasminogen activator inhibitor type 1), member 1 |
| SOCS1    | Suppressor of cytokine signaling 1                                                            |
| TNF      | Tumor necrosis factor                                                                         |
| TSHR     | Thyroid-stimulating hormone receptor                                                          |
| UCP1     | Uncoupling protein 1 (mitochondrial, proton carrier)                                          |
| VCAM1    | Vascular cell adhesion molecule 1                                                             |
| VEGFA    | Vascular endothelial growth factor A                                                          |
| YWHAZ    | Tyrosine 3-monooxygenase/tryptophan 5-monooxygenase activation protein, $\zeta$ -polypeptide  |
| B2M      | $\beta_2$ -Microglobulin                                                                      |
| HPRT1    | Hypoxanthine phosphoribosyltransferase 1                                                      |
| RPL13A   | Ribosomal protein L13a                                                                        |
| GAPDH    | Glyceraldehyde-3-phosphate dehydrogenase                                                      |
| ACTB     | Actin, $\beta$                                                                                |
| HGDC     | Human genomic DNA contamination                                                               |
| RTC      | Reverse transcription control                                                                 |
| PPC      | Positive PCR control                                                                          |

**Table S2. ICAM-1 expression on human umbilical vein endothelial cells is experimentally lower than on TNBC cells by flow cytometry measurement**

| Cell line  | ICAM-1, molecules/cell |
|------------|------------------------|
| MDA-MB-231 | 2,350,000 $\pm$ 25,000 |
| MDA-MB-157 | 751,000 $\pm$ 4,400    |
| MDA-MB-436 | 756,000 $\pm$ 7,600    |
| HUVEC      | 284,000 $\pm$ 4,600    |
| MCF10A     | 93,000 $\pm$ 2,300     |

HUVEC, human umbilical vein endothelial cells.
